# Supplementary material for: A ‘fish finder’ for birds? Route-dependent foraging behavior of the brown booby (Sula leucogaster) following a passenger ferry in the Ogasawara Islands, Japan
Source: PeerJ journal article supplement (doi:10.7717/peerj.21093), 2026-05-08
Supplement: fieldnote_template_boobies_130343_21093_StaffFileAS.pdf [file fieldnote_template_boobies_130343_21093_StaffFileAS.pdf]

Date:

Weather condition:

From:

To:

Recorded by

| Minute from departure | Number of accompanying brown boobies<br>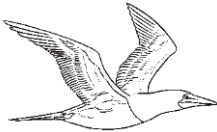 | Number of plunge-diving events<br> | Minute from departure | Number of accompanying brown boobies<br> | Number of plunge-diving events<br> |
|-----------------------|---------------------------------------------------------------------------------------------------------------------------|----------------------------------------------------------------------------------------------------------------------|-----------------------|-----------------------------------------------------------------------------------------------------------------------------|-----------------------------------------------------------------------------------------------------------------------|
| 1                     |                                                                                                                           |                                                                                                                      | 31                    |                                                                                                                             |                                                                                                                       |
| 2                     |                                                                                                                           |                                                                                                                      | 32                    |                                                                                                                             |                                                                                                                       |
| 3                     |                                                                                                                           |                                                                                                                      | 33                    |                                                                                                                             |                                                                                                                       |
| 4                     |                                                                                                                           |                                                                                                                      | 34                    |                                                                                                                             |                                                                                                                       |
| 5                     |                                                                                                                           |                                                                                                                      | 35                    |                                                                                                                             |                                                                                                                       |
| 6                     |                                                                                                                           |                                                                                                                      | 36                    |                                                                                                                             |                                                                                                                       |
| 7                     |                                                                                                                           |                                                                                                                      | 37                    |                                                                                                                             |                                                                                                                       |
| 8                     |                                                                                                                           |                                                                                                                      | 38                    |                                                                                                                             |                                                                                                                       |
| 9                     |                                                                                                                           |                                                                                                                      | 39                    |                                                                                                                             |                                                                                                                       |
| 10                    |                                                                                                                           |                                                                                                                      | 40                    |                                                                                                                             |                                                                                                                       |
| 11                    |                                                                                                                           |                                                                                                                      | 41                    |                                                                                                                             |                                                                                                                       |
| 12                    |                                                                                                                           |                                                                                                                      | 42                    |                                                                                                                             |                                                                                                                       |
| 13                    |                                                                                                                           |                                                                                                                      | 43                    |                                                                                                                             |                                                                                                                       |
| 14                    |                                                                                                                           |                                                                                                                      | 44                    |                                                                                                                             |                                                                                                                       |
| 15                    |                                                                                                                           |                                                                                                                      | 45                    |                                                                                                                             |                                                                                                                       |
| 16                    |                                                                                                                           |                                                                                                                      | 46                    |                                                                                                                             |                                                                                                                       |
| 17                    |                                                                                                                           |                                                                                                                      | 47                    |                                                                                                                             |                                                                                                                       |
| 18                    |                                                                                                                           |                                                                                                                      | 48                    |                                                                                                                             |                                                                                                                       |
| 19                    |                                                                                                                           |                                                                                                                      | 49                    |                                                                                                                             |                                                                                                                       |
| 20                    |                                                                                                                           |                                                                                                                      | 50                    |                                                                                                                             |                                                                                                                       |
| 21                    |                                                                                                                           |                                                                                                                      | 51                    |                                                                                                                             |                                                                                                                       |
| 22                    |                                                                                                                           |                                                                                                                      | 52                    |                                                                                                                             |                                                                                                                       |
| 23                    |                                                                                                                           |                                                                                                                      | 53                    |                                                                                                                             |                                                                                                                       |
| 24                    |                                                                                                                           |                                                                                                                      | 54                    |                                                                                                                             |                                                                                                                       |
| 25                    |                                                                                                                           |                                                                                                                      | 55                    |                                                                                                                             |                                                                                                                       |
| 26                    |                                                                                                                           |                                                                                                                      | 56                    |                                                                                                                             |                                                                                                                       |
| 27                    |                                                                                                                           |                                                                                                                      | 57                    |                                                                                                                             |                                                                                                                       |
| 28                    |                                                                                                                           |                                                                                                                      | 58                    |                                                                                                                             |                                                                                                                       |
| 29                    |                                                                                                                           |                                                                                                                      | 59                    |                                                                                                                             |                                                                                                                       |
| 30                    |                                                                                                                           |                                                                                                                      | 60                    |                                                                                                                             |                                                                                                                       |

\* Note: How to use this sheet

1. Observations were recorded at 1-minute intervals from departure to arrival (total 120 minutes).
2. The number of accompanying birds represents the maximum number of individuals visible around the vessel during each minute.
3. Plunge-diving events were counted whenever a dive was visually confirmed during the same minute.
4. Counts were recorded manually using tally marks while continuously observing from the upper deck.

Supplementary material S2 for: Hayashi R. 2026. A 'fish finder' for birds? Route-dependent foraging behavior of the brown booby (*Sula leucogaster*) following a passenger ferry in the Ogasawara Islands, Japan. *PeerJ* 14:e21093 <http://doi.org/10.7717/peerj.21093>

Illustrations of brown booby: © Chihiro Kinoshita. Used with permission.

Date:

Weather condition:

From:

To:

Recorded by

| Minute from departure | Number of accompanying brown boobies<br> | Number of plunge-diving events<br> | Minute from departure | Number of accompanying brown boobies<br> | Number of plunge-diving events<br> |
|-----------------------|---------------------------------------------------------------------------------------------------------------------------|----------------------------------------------------------------------------------------------------------------------|-----------------------|-----------------------------------------------------------------------------------------------------------------------------|-----------------------------------------------------------------------------------------------------------------------|
| 61                    |                                                                                                                           |                                                                                                                      | 91                    |                                                                                                                             |                                                                                                                       |
| 62                    |                                                                                                                           |                                                                                                                      | 92                    |                                                                                                                             |                                                                                                                       |
| 63                    |                                                                                                                           |                                                                                                                      | 93                    |                                                                                                                             |                                                                                                                       |
| 64                    |                                                                                                                           |                                                                                                                      | 94                    |                                                                                                                             |                                                                                                                       |
| 65                    |                                                                                                                           |                                                                                                                      | 95                    |                                                                                                                             |                                                                                                                       |
| 66                    |                                                                                                                           |                                                                                                                      | 96                    |                                                                                                                             |                                                                                                                       |
| 67                    |                                                                                                                           |                                                                                                                      | 97                    |                                                                                                                             |                                                                                                                       |
| 68                    |                                                                                                                           |                                                                                                                      | 98                    |                                                                                                                             |                                                                                                                       |
| 69                    |                                                                                                                           |                                                                                                                      | 99                    |                                                                                                                             |                                                                                                                       |
| 70                    |                                                                                                                           |                                                                                                                      | 100                   |                                                                                                                             |                                                                                                                       |
| 71                    |                                                                                                                           |                                                                                                                      | 101                   |                                                                                                                             |                                                                                                                       |
| 72                    |                                                                                                                           |                                                                                                                      | 102                   |                                                                                                                             |                                                                                                                       |
| 73                    |                                                                                                                           |                                                                                                                      | 103                   |                                                                                                                             |                                                                                                                       |
| 74                    |                                                                                                                           |                                                                                                                      | 104                   |                                                                                                                             |                                                                                                                       |
| 75                    |                                                                                                                           |                                                                                                                      | 105                   |                                                                                                                             |                                                                                                                       |
| 76                    |                                                                                                                           |                                                                                                                      | 106                   |                                                                                                                             |                                                                                                                       |
| 77                    |                                                                                                                           |                                                                                                                      | 107                   |                                                                                                                             |                                                                                                                       |
| 78                    |                                                                                                                           |                                                                                                                      | 108                   |                                                                                                                             |                                                                                                                       |
| 79                    |                                                                                                                           |                                                                                                                      | 109                   |                                                                                                                             |                                                                                                                       |
| 80                    |                                                                                                                           |                                                                                                                      | 110                   |                                                                                                                             |                                                                                                                       |
| 81                    |                                                                                                                           |                                                                                                                      | 111                   |                                                                                                                             |                                                                                                                       |
| 82                    |                                                                                                                           |                                                                                                                      | 112                   |                                                                                                                             |                                                                                                                       |
| 83                    |                                                                                                                           |                                                                                                                      | 113                   |                                                                                                                             |                                                                                                                       |
| 84                    |                                                                                                                           |                                                                                                                      | 114                   |                                                                                                                             |                                                                                                                       |
| 85                    |                                                                                                                           |                                                                                                                      | 115                   |                                                                                                                             |                                                                                                                       |
| 86                    |                                                                                                                           |                                                                                                                      | 116                   |                                                                                                                             |                                                                                                                       |
| 87                    |                                                                                                                           |                                                                                                                      | 117                   |                                                                                                                             |                                                                                                                       |
| 88                    |                                                                                                                           |                                                                                                                      | 118                   |                                                                                                                             |                                                                                                                       |
| 89                    |                                                                                                                           |                                                                                                                      | 119                   |                                                                                                                             |                                                                                                                       |
| 90                    |                                                                                                                           |                                                                                                                      | 120                   |                                                                                                                             |                                                                                                                       |

\* Note: How to share your record (optional)

1. Archive your completed fieldnote and any raw data under your own authorship (e.g., Zenodo) and obtain a DOI.
2. If you post photos/videos, include a brief caption (date, ferry route, time window).
3. For questions about archiving or potential collaboration (reply not guaranteed), see the corresponding author details in the associated article, or contact: bubobubo32[at]gmail.com.

Supplementary material S2 for: Hayashi R. 2026. A 'fish finder' for birds? Route-dependent foraging behavior of the brown booby (*Sula leucogaster*) following a passenger ferry in the Ogasawara Islands, Japan. *PeerJ* 14:e21093 <http://doi.org/10.7717/peerj.21093>

Illustrations of brown booby: © Chihiro Kinoshita. Used with permission.
